# Supplementary material
Source: PubMed Central journal article supplement (PMC5736809)
Supplement: IAI.00548-17_zii999092255s1.pdf [file IAI.00548-17_zii999092255s1.pdf]

**Supplemental Table 1.** Cytokine and chemokine levels in culture supernatants of wild-type bone marrow-derived macrophages infected with *Mycoplasma pneumoniae* (Mp).

| Hours post-infection | 4              |                   | 8              |                    | 16             |                    |
|----------------------|----------------|-------------------|----------------|--------------------|----------------|--------------------|
|                      | Mock           | Mp-infected       | Mock           | Mp-infected        | Mock           | Mp-infected        |
| Cytokine             |                |                   |                |                    |                |                    |
| IL-1a                | 1.26*          | 33.17 ± 0.76      | 2.19 ± 1.07    | 249.26 ± 16.22     | 2.20 ± 1.16    | 870.86 ± 181.61    |
| IL-1b                | 1.28*          | 13.81 ± 3.09      | 1.28*          | 376.01 ± 72.74     | 1.28*          | 1262.46 ± 223.27   |
| IL-6                 | .059*          | 6695.25 ± 355.57  | 1.44 ± 1.0     | 14568 ± 1008.05    | 1.48 ± 0.65    | 22933**            |
| TNF-a                | 1.53*          | 1389.62 ± 424.94  | 2.04 ± 1.01    | 1518.43 ± 529.53   | 4.34 ± 0.56    | 1300.50 ± 130.23   |
| G-CSF                | 1.25*          | 974.62 ± 45.36    | 1.25*          | 9475.75 ± 1293.42  | 1.25*          | 15882 ± 566.09     |
| IP-10                | 2.97 ± 1.05    | 87.30 ± 7.13      | 10.18 ± 0.73   | 4047.5 ± 391.66    | 27.88 ± 6.66   | 4899.25 ± 301.13   |
| KC                   | 3.20 ± 0.32    | 6383.25 ± 334.27  | 6.17 ± 1.92    | 9631.25 ± 1063.31  | 5.01 ± 0.98    | 10982.25 ± 942.22  |
| MCP-1                | 272.87 ± 11.15 | 871.92 ± 80.07    | 407.80 ± 69.82 | 1782 ± 131.03      | 654.98 ± 35.03 | 2380.75 ± 97.02    |
| MIP-1a               | 124.48 ± 4.67  | 6889.03 ± 327.58  | 180.33 ± 8.86  | 8500.53 ± 792.78   | 186.4 ± 6.56   | 8027.78 ± 538.17   |
| MIP-1b               | 179.67 ± 10.42 | 3302.00 ± 704.72  | 272.93 ± 23.23 | 12553.25 ± 2135.92 | 324.54 ± 17.48 | 10332.50 ± 2875.84 |
| MIP-2                | 63.77 ± 5.30   | 12972.50 ± 696.30 | 132.19 ± 6.56  | 13495.75 ± 826.78  | 166.89 ± 25.82 | 13610.25**         |

\*Denotes values that were below limit of detection

\*\*Denotes values that reached multiplex assay detection limit

Values are represented in linear scale and were normalized by subtracting uninfected control values from infected values
